# Supplementary material for: Transcriptome analysis of the spalax hypoxia survival response includes suppression of apoptosis and tight control of angiogenesis
Source: PubMed Central journal article supplement (PMC3533650; doi:10.1186/1471-2164-13-615), 2012-11-13
Supplement: 1471-2164-13-615-S1.pdf [file 1471-2164-13-615-S1.pdf]

**Table S1: RLT-q-PCR primers.**

|                                                                                                                     |
|---------------------------------------------------------------------------------------------------------------------|
| <p><i>Spalax TNNT3</i><br/>5'- GGA GGT CGC TGG AAG TAA AGG -3' -F<br/>5'- AAG TCA GGC AGG CAG GTC TCT -3' -R</p>    |
| <p><i>Spalax TNNI2</i><br/>5'- CAT CCC GGG CTC CAT GT -3' -F<br/>5'- CGA TCT TCG CAT GCA GTT GT -3' -R</p>          |
| <p><i>Spalax TNNC2</i><br/>5'- GCG GCC ATC ATT GTT CTT ATC -3' -F<br/>5'- GCA CGT GAC AGA CGA GGA GAT -3' -R</p>    |
| <p><i>Spalax TSP1</i><br/>5'- CCA TTT CAC ATG GAA TTG GTT GT -3' -F<br/>5'- AGA GGG CTG TGG CTT CCT TT -3' -R</p>   |
| <p><i>Spalax DSCR1</i><br/>5' - TCC AGT TCT ACA AAC CGC TAG TG - 3' -F<br/>5' - CGG CCT GTG GTT GTT TCC – 3' -R</p> |
| <p><i>18S</i><br/>5'- GAT CCA TTG GAG GGC AAG TCT -3' -F<br/>5'- AAC TGC AGC AAC TTT AAT ATA CGC TAT T -3' -R</p>   |
